# Supplementary material for: Interrupted time-series analysis of the impact of generic market entry of antineoplastic products in China
Source: PubMed Central journal article supplement — BMJ Open. 2018 Jul 16;8(7):e022328. doi: 10.1136/bmjopen-2018-022328 (PMC6082476; doi:10.1136/bmjopen-2018-022328), 2018-07-16
Supplement: bmjopen-2018-022328supp001.pdf [file bmjopen-2018-022328supp001.pdf]

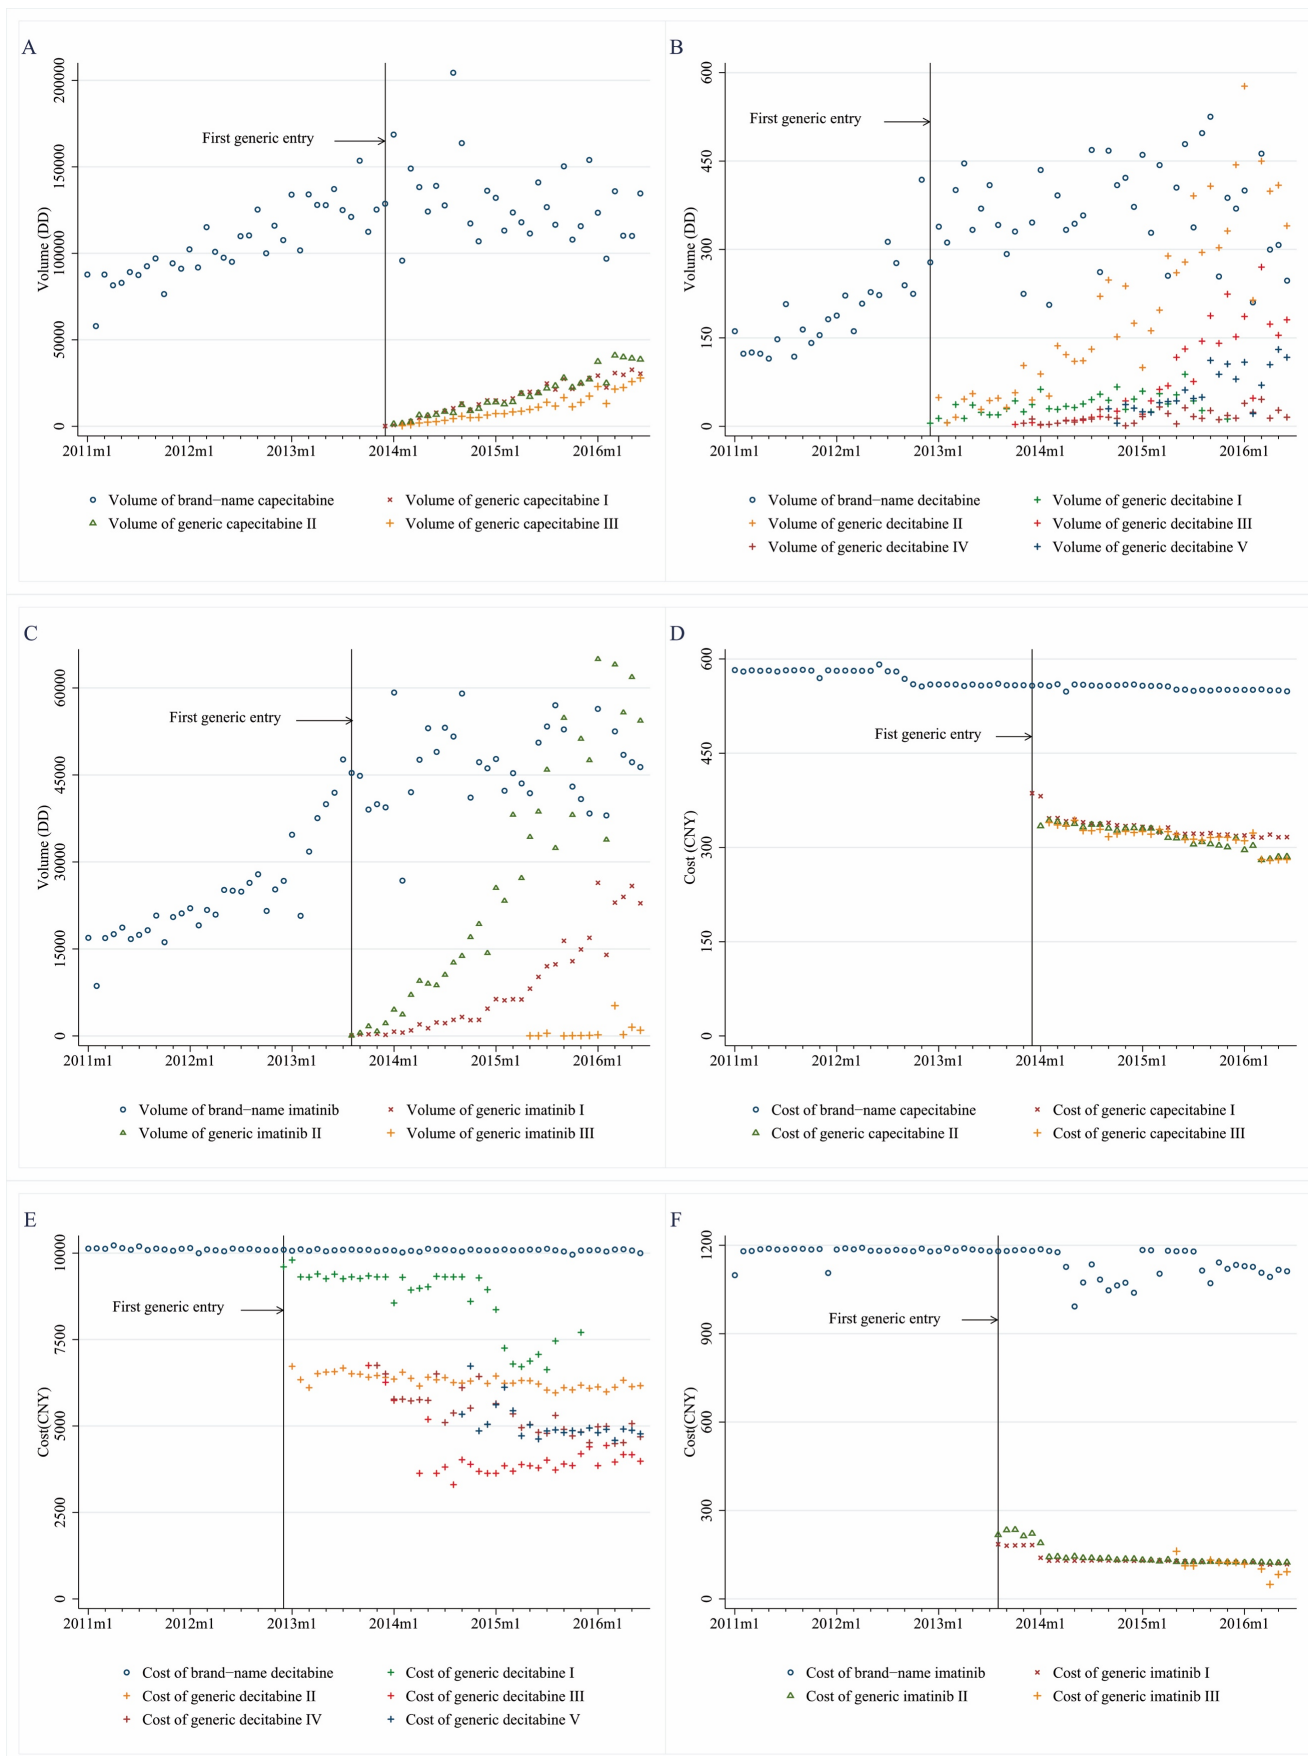

Supplement Figure 1 Volume and cost of three antineoplastic agents from January 2011 to June 2016. (A) volume of brand-name capecitabine and three generic substitutions; (B) volume of brand-name decitabine and five generic substitutions; (C) volume of brand-name imatinib and three generic substitutions; (D) cost of brand-name capecitabine and three generic substitutions; (E) cost of brand-name decitabine and five generic substitutions; (F) cost of brand-name imatinib and three generic substitutions
