# Supplementary material for: Interrupted time-series analysis of the impact of generic market entry of antineoplastic products in China
Source: PubMed Central journal article supplement — BMJ Open. 2018 Jul 16;8(7):e022328. doi: 10.1136/bmjopen-2018-022328 (PMC6082476; doi:10.1136/bmjopen-2018-022328), 2018-07-16
Supplement: bmjopen-2018-022328supp002.pdf [file bmjopen-2018-022328supp002.pdf]

Supplement Table 1 Descriptive summary of three antineoplastic study drugs

| ATC     | Generic name | Indication                                                                                | Brand-name producer | First entry of generic | Number of generic entrants |
|---------|--------------|-------------------------------------------------------------------------------------------|---------------------|------------------------|----------------------------|
| L01BC06 | capecitabine | Breast cancer, gastric cancer and colorectal cancer                                       | Genentech (Roche)   | 2013-12                | 3                          |
| L01BC08 | decitabine   | Myelodysplastic syndromes                                                                 | Pharmachemie        | 2012-12                | 5                          |
| L01XE01 | imatinib     | Chronic myelocytic leukemia, acute lymphoblastic leukemia, gastrointestinal Stromal Tumor | Novartis            | 2013-08                | 3                          |
